# Supplementary material for: High-Performance Ultraviolet Photodetector Based on a Zinc Oxide Nanoparticle@Single-Walled Carbon Nanotube Heterojunction Hybrid Film
Source: MDPI journal article supplement (doi:10.3390/nano10020395), 2020-02-24
Supplement: s1 [file s1]

## Supplementary Materials

### **High-performance ultraviolet photodetector based on a zinc oxide nanoparticle@single-walled carbon nanotube heterojunction hybrid film**

Myung-Soo Choi<sup>1</sup>, Taehyun Park<sup>1</sup>, Woo-Jae Kim<sup>2\*</sup>, and Jaehyun Hur<sup>1\*</sup>

<sup>1</sup>Department of Chemical and Biological Engineering, Gachon University, Seongnam, Gyeonggi 13120, Republic of Korea

<sup>2</sup>Department of Chemical Engineering and Materials Science, Ewha Womans University, Seoul 03760, Korea

---

\*Corresponding authors. Prof. W.-J. Kim (Tel: +82-2-3277-4327; Fax: +82-2-3277-4213) and Prof. J. Hur (Tel: +82-31-750-5593; Fax: +82-31-750-8839)

E-mail addresses: wjkim1974@ewha.ac.kr and jhhur@gachon.ac.kr

(a) ZnO@A-SWNT (ratio of 40:1)

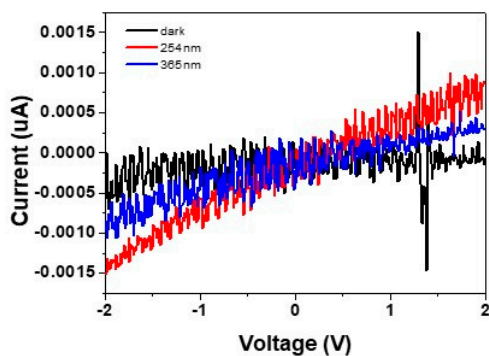

(b) ZnO@A-SWNT (ratio of 28:1)

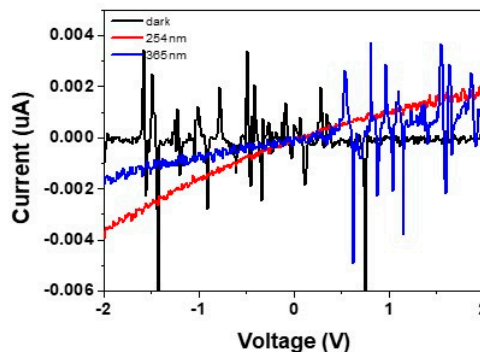

(c) ZnO@H-SWNT (ratio of 40:1)

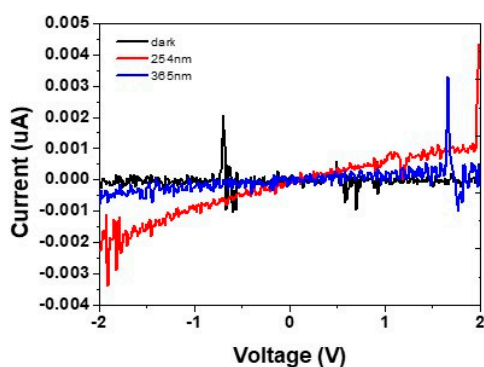

(d) ZnO@H-SWNT (ratio of 28:1)

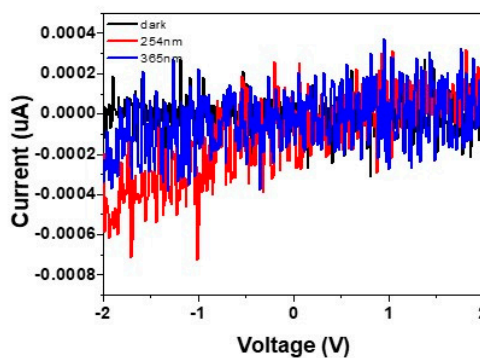

(e) ZnO@C-SWNT (ratio of 40:1)

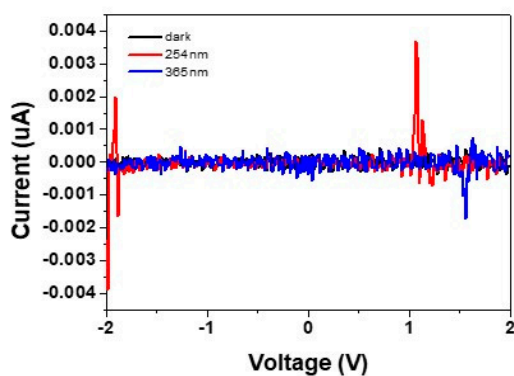

(f) ZnO@C-SWNT (ratio of 28:1)

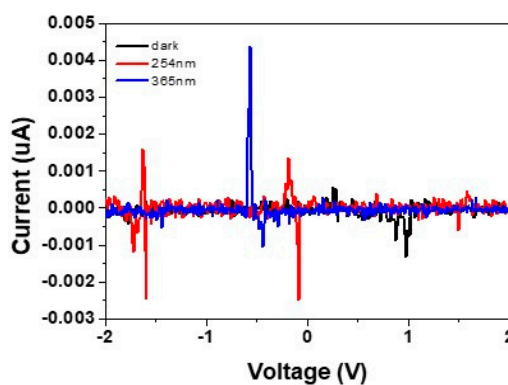

**Fig. S1.** I-V measurements for ZnO@SWNT with A-SWNTs, H-SWNTs, and C-SWNTs at the ratios of 40:1 and 28:1 (ZnO/SWNT, w/w) under 254 and 365 nm UV irradiation (0.47 mW/cm<sup>2</sup>).

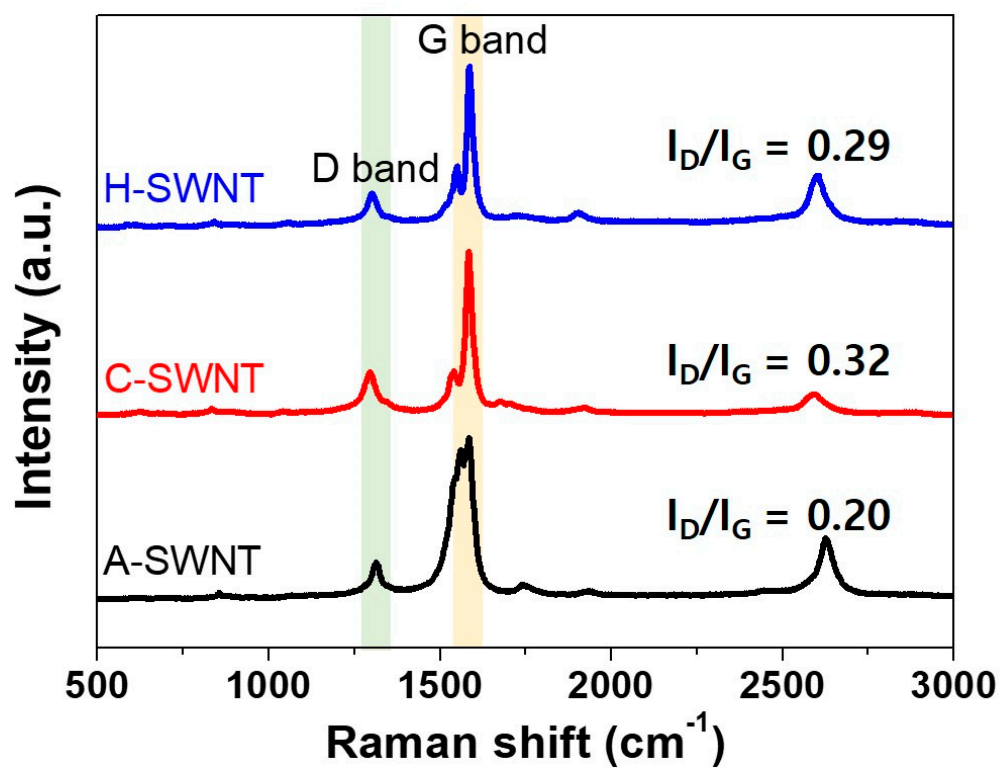

**Fig. S2.** Comparison of Raman spectra for different types of SWNTs (H-SWNTs, C-SWNTs, and A-SWNTs).

(a) ZnO NP/A-SWNT solution

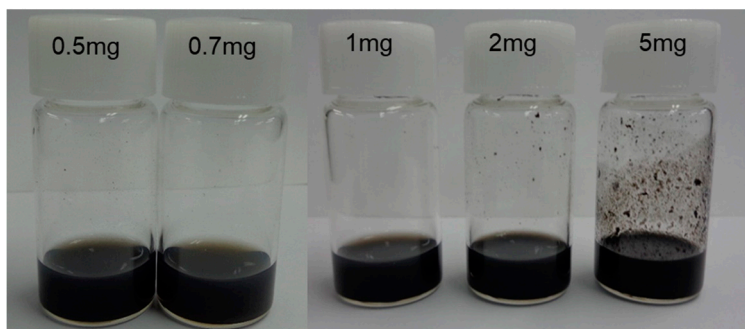

(b) ZnO NP/H-SWNT solution

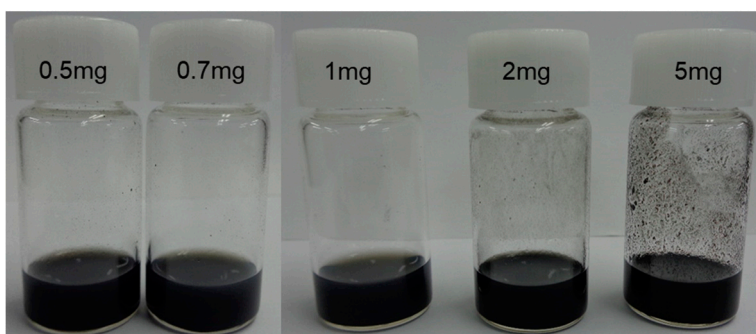

(c) ZnO NP/C-SWNT solution

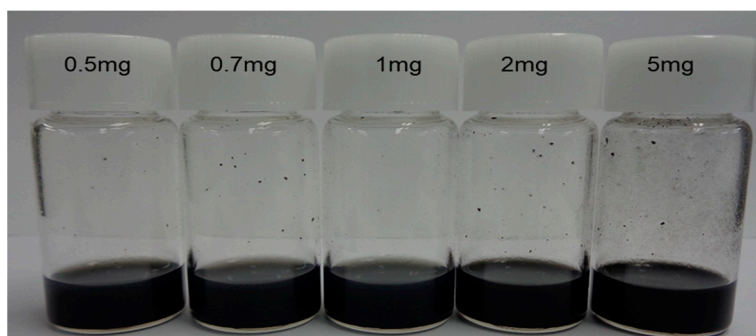

**Fig. S3.** Photographs of ZnO NP/SWNT solutions with different types of SWNTs (A-SWNTs, H-SWNTs, and C-SWNTs). The weights of SWNTs dispersed in 10 mg/ml ZnO NP solution (solvent: methanol + butanol) were 0.5 mg, 0.7 mg, 1.0 mg, 2.0 mg, and 5.0 mg, corresponding to the weight ratios of 40:1, 28:1, 20:1, 10:1, and 4:1 between ZnO and CNTs.

(a) ZnO NP/A-SWNT solution

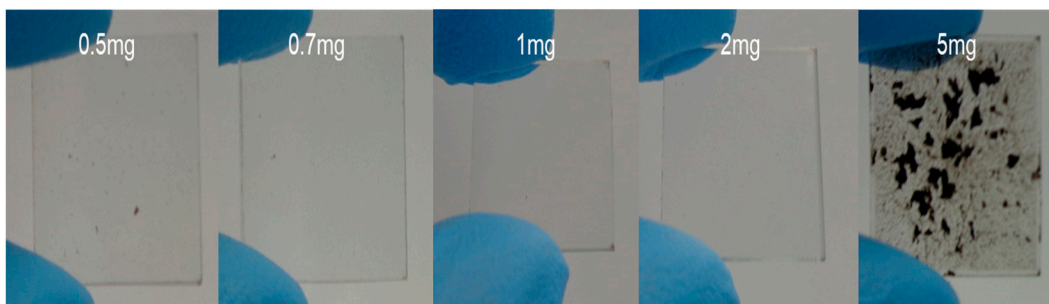

(b) ZnO NP/H-SWNT solution

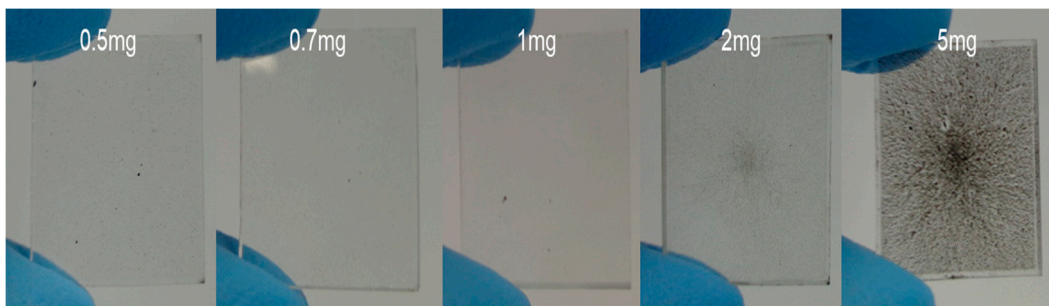

(c) ZnO NP/C-SWNT solution

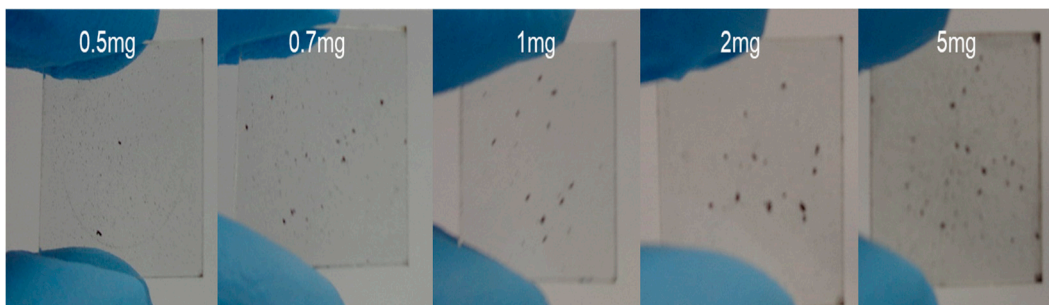

**Fig. S4.** Photographs of ZnO@SWNT hybrid films (films were prepared using the solution shown in Fig. S4). Therefore, the weight ratios between ZnO and CNTs were the same as those in Fig. S4 (40:1, 28:1, 20:1, 10:1, and 4:1 for 0.5 mg, 0.7 mg, 1.0 mg, 2.0 mg, and 5.0 mg SWNTs in 10 mg/ml ZnO NP solution).
